# Supplementary material
Source: PubMed Central journal article supplement (PMC5415218)
Supplement: UEG689525_supplementary_material.pdf [file UEG689525_supplementary_material.pdf]

## Reference list (continuation)

21. Wen T, Dellon ES, Moawad FJ, et al. Transcriptome analysis of proton pump inhibitor-responsive esophageal eosinophilia reveals proton pump inhibitor-reversible allergic inflammation. *J Allergy Clin Immunol* 2015;135:187–197.
22. Cheng E, Zhang X, Huo X, et al. Omeprazole blocks eotaxin-3 expression by oesophageal squamous cells from patients with eosinophilic oesophagitis and GORD. *Gut* 2013;62:824–832.
23. Sodikoff J, Hirano I. Proton pump inhibitor-responsive esophageal eosinophilia does not preclude food-responsive eosinophilic esophagitis. *J Allergy Clin Immunol* 2016;137:631–633.
24. Lucendo AJ, Arias A, Gonzalez-Cervera J, et al. Dual response to dietary/topical steroid and proton pump inhibitor therapy in adult patients with eosinophilic esophagitis. *J Allergy Clin Immunol* 2016; 137:931–934.
25. Ishimura N, Ishihara S, Kinoshita Y. Sustained acid suppression by potassium-competitive acid blocker (P-CAB) may be an attractive treatment candidate for patients with eosinophilic esophagitis. *Am J Gastroenterol* 2016;111:1203–1204.
26. Spechler SJ, Genta RM, Souza RF. Thoughts on the complex relationship between gastroesophageal reflux disease and eosinophilic esophagitis. *Am J Gastroenterol* 2007;102:1301–1306.
27. Krarup AL, Villadsen GE, Mejlgaard E, et al. Acid hypersensitivity in patients with eosinophilic oesophagitis. *Scand J Gastroenterol* 2010;45:273–281.
28. Sayej WN, Patel R, Baker RD, et al. Treatment with high-dose proton pump inhibitors helps distinguish eosinophilic esophagitis from noneosinophilic esophagitis. *J Pediatr Gastroenterol Nutr* 2009;49:393–399.
29. Pentiu S, Putnam PE, Collins MH, et al. Dissociation between symptoms and histological severity in pediatric eosinophilic esophagitis. *J Pediatr Gastroenterol Nutr* 2009;48:152–160.
30. Molina-Infante J, van Rhijn BD. Interactions between gastro-oesophageal reflux disease and eosinophilic oesophagitis. *Best Pract Res Clin Gastroenterol* 2015;29:749–758.
31. Levine J, Lai J, Edelman M, et al. Conservative long-term treatment of children with eosinophilic esophagitis. *Ann Allergy Asthma Immunol* 2012;108:363–366.
32. Arias A, Lucendo AJ. Prevalence of eosinophilic oesophagitis in adult patients in a central region of Spain. *Eur J Gastroenterol Hepatol* 2013;25:208–212.
33. Hruz P, Straumann A, Bussmann C, et al. Escalating incidence of eosinophilic esophagitis: a 20-year prospective, population-based study in Olten County, Switzerland. *J Allergy Clin Immunol* 2011;128:1349–1350.
34. Straumann A, Simon H-U. Eosinophilic esophagitis: escalating epidemiology? *J Allergy Clin Immunol* 2005;115:418–419.

35. Giriens B, Yan P, Safroneeva E, et al. Escalating incidence of eosinophilic esophagitis in Canton of Vaud, Switzerland, 1993-2013: a population-based study. *Allergy* 2015;70:1633–1639.
36. Prasad GA, Alexander JA, Schleck CD, et al. Epidemiology of eosinophilic esophagitis over three decades in Olmsted County, Minnesota. *Clin Gastroenterol Hepatol* 2009;7:1055–1061.
37. Dellon ES, Jensen ET, Martin CF, et al. Prevalence of eosinophilic esophagitis in the United States. *Clin Gastroenterol Hepatol* 2014;12:589–596.
38. Noel RJ, Putnam PE, Rothenberg ME. Eosinophilic esophagitis. *New England J Med* 2004;351:940–941.
39. Syed AN, Andrews CN, Shaffer E, et al. The rising incidence of eosinophilic oesophagitis is associated with increasing biopsy rates: a population-based study. *Aliment Pharmacol Ther* 2012;36:950–958.
40. Stewart MJ, Shaffer E, Urbanski SJ, et al. The association between celiac disease and eosinophilic esophagitis in children and adults. *BMC Gastroenterol* 2013; 13:96.
41. Maradey-Romero C, Prakash R, Lewis S, et al. The 2011-2014 prevalence of eosinophilic oesophagitis in the elderly amongst 10 million patients in the United States. *Aliment Pharmacol Ther* 2015;41:1016–1022.
42. Prakash R, Maradey C, Fass R. Eosinophilic esophagitis is much less common than previously thought: a large nationwide database study. *Am J Gastroenterol* 2013;108(Suppl):S33.
43. Dellon ES, Erichsen R, Baron JA, et al. The increasing incidence and prevalence of eosinophilic oesophagitis outpaces changes in endoscopic and biopsy practice: national population-based estimates from Denmark. *Aliment Pharmacol Ther* 2015;41:662–670.
44. Soon IS, Butzner JD, Kaplan GG, et al. Incidence and prevalence of eosinophilic esophagitis in children. *J Pediatr Gastroenterol Nutr* 2013;57:72–80.
45. Arias A, Perez-Martinez I, Tenias JM, et al. Systematic review with meta-analysis: the incidence and prevalence of eosinophilic oesophagitis in children and adults in population-based studies. *Aliment Pharmacol Ther* 2016;43:3–15.
46. Veerappan GR, Perry JL, Duncan TJ, et al. Prevalence of eosinophilic esophagitis in an adult population undergoing upper endoscopy: a prospective study. *Clin Gastroenterol Hepatol* 2009;7:420–426.
47. Dellon ES. Epidemiology of eosinophilic esophagitis. *Gastroenterol Clin North Am* 2014;43:201–218.
48. Foroutan M, Norouzi A, Molaei M, et al. Eosinophilic esophagitis in patients with refractory gastroesophageal reflux disease. *Dig Dis Sci* 2010;55:28–31.
49. Garcia-Compean D, Gonzalez Gonzalez JA, Marrufo Garcia CA, et al. Prevalence of eosinophilic esophagitis in patients with refractory

- gastroesophageal reflux disease symptoms: A prospective study. *Dig Liver Dis* 2011;43:204–208.
50. Salem SB, Kushner Y, Marcus V, et al. The potential impact of contemporary developments in the management of patients with gastroesophageal reflux disease undergoing an initial gastroscopy. *Can J Gastroenterol* 2009;23:99–104.
  51. Poh CH, Gasiorowska A, Navarro-Rodriguez T, et al. Upper GI tract findings in patients with heartburn in whom proton pump inhibitor treatment failed versus those not receiving antireflux treatment. *Gastrointest Endosc* 2010;71:28–34.
  52. Sá CC, Kishi HS, Silva-Werneck AL, et al. Eosinophilic esophagitis in patients with typical gastroesophageal reflux disease symptoms refractory to proton pump inhibitor. *Clinics (Sao Paulo). Brazil*; 2011;66:557–561.
  53. Achem SR, Almansa C, Krishna M, et al. Oesophageal eosinophilic infiltration in patients with noncardiac chest pain. *Aliment Pharmacol Ther* 2011;33:1194–1201.
  54. Ricker J, McNear S, Cassidy T, et al. Routine screening for eosinophilic esophagitis in patients presenting with dysphagia. *Therap Adv Gastroenterol* 2011;4:27–35.
  55. Savarino E, Tolone S, Caccaro R, et al. Clinical, endoscopic, histological and radiological characteristics of Italian patients with eosinophilic oesophagitis. *Dig Liver Dis* 2015;47:1033–1038.
  56. Sperry SLW, Crockett SD, Miller CB, et al. Esophageal foreign-body impactions: epidemiology, time trends, and the impact of the increasing prevalence of eosinophilic esophagitis. *Gastrointest Endosc* 2011;74:985–991.
  57. Desai TK, Stecevic V, Chang C-H, et al. Association of eosinophilic inflammation with esophageal food impaction in adults. *Gastrointest Endosc* 2005;61:795–801.
  58. Kerlin P, Jones D, Remedios M, et al. Prevalence of eosinophilic esophagitis in adults with food bolus obstruction of the esophagus. *J Clin Gastroenterol* 2007;41:356–361.
  59. Hurtado CW, Furuta GT, Kramer RE. Etiology of esophageal food impactions in children. *J Pediatr Gastroenterol Nutr* 2011;52:43–46.
  60. Thakkar K, Chen L, Tatevian N, et al. Diagnostic yield of oesophagogastroduodenoscopy in children with abdominal pain. *Aliment Pharmacol Ther* 2009;30:662–669.
  61. Hill CA, Ramakrishna J, Fracchia MS, et al. Prevalence of eosinophilic esophagitis in children with refractory aerodigestive symptoms. *JAMA Otolaryngol Head Neck Surg* 2013;139:903–906.
  62. Kapel RC, Miller JK, Torres C, et al. Eosinophilic esophagitis: a prevalent disease in the United States that affects all age groups. *Gastroenterology* 2008;134:1316–1321.

63. Liacouras CA, Spergel JM, Ruchelli E, et al. Eosinophilic esophagitis: A 10-year experience in 381 children. *Clin Gastroenterol Hepatol* 2005;3:1198–1206.
64. Spergel JM, Brown-Whitehorn TF, Beausoleil JL, et al. 14 years of eosinophilic esophagitis: clinical features and prognosis. *J Pediatr Gastroenterol Nutr* 2009;48:30–36.
65. Otteson TD, Mantle BA, Casselbrant ML, et al. The otolaryngologic manifestations in children with eosinophilic esophagitis. *Int J Pediatr Otorhinolaryngol* 2012;76:116–119.
66. Iwanczak B, Janczyk W, Ryzko J, et al. Eosinophilic esophagitis in children: frequency, clinical manifestations, endoscopic findings, and seasonal distribution. *Adv Med Sci* 2011;56:151–157.
67. Ally MR, Maydonovitch CL, Betteridge JD, et al. Prevalence of eosinophilic esophagitis in a United States military health-care population. *Dis Esophagus* 2015;28:505–511.
68. Sgouros SN, Bergele C, Mantides A. Eosinophilic esophagitis in adults: a systematic review. *Eur J Gastroenterol Hepatol* 2006;18:211–217.
69. Sealock RJ, Rendon G, El-Serag HB. Systematic review: the epidemiology of eosinophilic oesophagitis in adults. *Aliment Pharmacol Ther* 2010;32:712–719.
70. Castro Jimenez A, Gomez Torrijos E, Garcia Rodriguez R, et al. Demographic, clinical and allergological characteristics of Eosinophilic Esophagitis in a Spanish central region. *Allergol Immunopathol (Madr)* 2014;42:407–414.
71. van Rhijn BD, Verheij J, Smout AJ, et al. Rapidly increasing incidence of eosinophilic esophagitis in a large cohort. *Neurogastroenterol Motil* 2013;25:47–52.
72. Alexander ES, Martin LJ, Collins MH, et al. Twin and family studies reveal strong environmental and weaker genetic cues explaining heritability of eosinophilic esophagitis. *J Allergy Clin Immunol* 2014;134:1084–1092.
73. Tomomatsu Y, Yoshino J, Inui K, et al. Clinical features of eosinophilic esophagitis: ten Japanese cases. *Dig Endosc* 2013;25:117–124.
74. Assiri AM, Saeed A. Incidence and diagnostic features of eosinophilic esophagitis in a group of children with dysphagia and gastroesophageal reflux disease. *Saudi Med J* 2014;35:292–297.
75. Ma X, Xu Q, Zheng Y, et al. Prevalence of esophageal eosinophilia and eosinophilic esophagitis in adults: a population-based endoscopic study in Shanghai, China. *Dig Dis Sci* 2015;60:1716–1723.
76. Cherian S, Smith NM, Forbes DA. Rapidly increasing prevalence of eosinophilic oesophagitis in Western Australia. *Arch Dis Child* 2006;91:1000–1004.
77. Ronkainen J, Talley NJ, Aro P, et al. Prevalence of oesophageal eosinophils and eosinophilic oesophagitis in adults: the population-based Kalixanda study. *Gut* 2007;56:615–620.

78. Sherrill JD, Gao P-S, Stucke EM, et al. Variants of thymic stromal lymphopoietin and its receptor associate with eosinophilic esophagitis. *J Allergy Clin Immunol* 2010;126:160–165.
79. González-Cervera J; Arias Á; Redondo-González O; et al. The association between atopic manifestations and eosinophilic esophagitis: a systematic review and meta-analysis. *Ann Allergy Asth Immunol* 2017 (in press).
80. Kelly KJ, Lazenby AJ, Rowe PC, et al. Eosinophilic esophagitis attributed to gastroesophageal reflux: improvement with an amino acid-based formula. *Gastroenterology* 1995;109:1503–1512.
81. Almansa C, Krishna M, Buchner AM, et al. Seasonal distribution in newly diagnosed cases of eosinophilic esophagitis in adults. *Am J Gastroenterol* 2009;104:828–833.
82. Chehade M. IgE and non-IgE-mediated food allergy: Treatment in 2007. *Curr Opin Allergy Clin Immunol* 2007;7:264–268.
83. Simon D, Marti H, Heer P, et al. Eosinophilic esophagitis is frequently associated with IgE-mediated allergic airway diseases. *J Allergy Clin Immunol* 2005;115:1090–1092.
84. Gonsalves N, Yang G-Y, Doerfler B, et al. Elimination diet effectively treats eosinophilic esophagitis in adults; food reintroduction identifies causative factors. *Gastroenterology* 2012;142:1451–1455.
85. Lucendo AJ, Arias A, Gonzalez-Cervera J, et al. Empiric 6-food elimination diet induced and maintained prolonged remission in patients with adult eosinophilic esophagitis: a prospective study on the food cause of the disease. *J Allergy Clin Immunol* 2013;131:797–804.
86. Sugnam KKN, Collins JT, Smith PK, et al. Dichotomy of food and inhalant allergen sensitization in eosinophilic esophagitis. *Allergy* 2007;62:1257–1260.
87. Dellon ES, Gibbs WB, Fritchie KJ, et al. Clinical, endoscopic, and histologic findings distinguish eosinophilic esophagitis from gastroesophageal reflux disease. *Clin Gastroenterol Hepatol* 2009;7:1305–1313.
88. Sanchez-Garcia S, Ibanez MD, Martinez-Gomez MJ, et al. Eosinophilic esophagitis, celiac disease, and immunoglobulin E-mediated allergy in a 2-year-old child. *J Investig Allergol Clin Immunol* 2011;21:73–75.
89. Ridolo E, De Angelis GL, Dall'aglio P. Eosinophilic esophagitis after specific oral tolerance induction for egg protein. *Annals Allergy Asthma Immunol* 2011;160:73–74.
90. Hofmann AM, Scurlock AM, Jones SM et al. Safety of a peanut oral immunotherapy protocol in children with peanut allergy. *J Allergy Clin Immunol* 2009;124:286–291.
91. Lucendo AJ, Arias A, Tenias JM. Relation between eosinophilic esophagitis and oral immunotherapy for food allergy: a systematic review with meta-analysis. *Ann Allergy Asthma Immunol* 2014;113:624–629.

92. Ibrahim Aibo A, Terrados S, Villafana L, et al. Eosinophilic esophagitis induced by milk oral immunotherapy in one patient. *Allergy* 2013;68(suppl 9):701.
93. Jensen ET, Eluri S, Lebwohl B, et al. Increased risk of esophageal eosinophilia and eosinophilic esophagitis in patients with active celiac disease on biopsy. *Clin Gastroenterol Hepatol* 2015;13:1426–1431.
94. Ludvigsson JF, Aro P, Walker MM, et al. Celiac disease, eosinophilic esophagitis and gastroesophageal reflux disease, an adult population-based study. *Scand J Gastroenterol* 2013;48:808–814.
95. Lucendo AJ, Arias Á, Tenias JM. Systematic review: The association between eosinophilic oesophagitis and coeliac disease. *Aliment Pharmacol Ther* 2014;40:422–434.
96. Lucendo AJ, Arias A, Perez-Martinez I, et al. Adult patients with eosinophilic esophagitis do not show an increased frequency of the HLA-DQ2/DQ8 genotypes predisposing to celiac disease. *Dig Dis Sci* 2011;56:1107–1111.
97. Dobbins JW, Sheahan DG BJ. Eosinophilic gastroenteritis with esophageal involvement. *Gastroenterology* 1977;72:1312–1316.
98. Ko HM, Morotti RA, Yershov O, et al. Eosinophilic gastritis in children: clinicopathological correlation, disease course, and response to therapy. *Am J Gastroenterol* 2014;109:1277–1285.
99. Straumann A, Spichtin H-P, Grize L, et al. Natural history of primary eosinophilic esophagitis: a follow-up of 30 adult patients for up to 11.5 years. *Gastroenterology* 2003;125:1660–1669.
100. Suttor VP, Chow C, Turner I. Eosinophilic esophagitis with Crohn's disease: a new association or overlapping immune-mediated enteropathy? *Am J Gastroenterol* 2009;104:794–795.
101. Mulder DJ, Hookey LC, Hurlbut DJ, et al. Impact of Crohn disease on eosinophilic esophagitis: evidence for an altered T(H)1-T(H)2 immune response. *J Pediatr Gastroenterol Nutr* 2011;53:213–215.
102. Jacobsen BA, Fallingborg J, Rasmussen HH, et al. Increase in incidence and prevalence of inflammatory bowel disease in northern Denmark: a population-based study, 1978-2002. *Eur J Gastroenterol Hepatol* 2015;18:601–606.
103. Lucendo AJ, Hervías D, Roncero O, et al. Epidemiology and temporal trends (2000-2012) of inflammatory bowel disease in adult patients in a central region of Spain. *Eur J Gastroenterol Hepatol* 2014;26:1399–1407.
104. Tysk C, Jörnerot G. Ulcerative proctocolitis in Orebro, Sweden. A retrospective epidemiologic study, 1963-1987. *Scand J Gastroenterol* 1992;27:945–950.
105. Lindberg E, Jörnerot G. The incidence of Crohn's disease is not decreasing in Sweden. *Scand J Gastroenterol* 1991;26:495–500.
106. Kappelman MD, Rifas-Shiman SL, Kleinman K, et al. The prevalence and geographic distribution of Crohn's disease and ulcerative colitis in the United

- States. *Clin Gastroenterol Hepatol* 2007;5:1424–1429.
107. Kappelman MD, Moore KR, Allen JK CS. Recent trends in the prevalence of Crohn's disease and ulcerative colitis in a commercially insured US population. *Dig Dis Sci* 2013;58:519–525.
  108. Johnsson M, Bove M, Bergquist H, et al. Distinctive blood eosinophilic phenotypes and cytokine patterns in eosinophilic esophagitis, inflammatory bowel disease and airway allergy. *J Innate Immun* 2011;3:594–604.
  109. Batres LA, Liacouras C, Schnauffer L, et al. Eosinophilic esophagitis associated with anastomotic strictures after esophageal atresia repair. *J Pediatr Gastroenterol Nutr* 2002;35:224–226.
  110. Gorter RR, Heij HA, van der Voorn JP, et al. Eosinophilic esophagitis after esophageal atresia: is there an association? Case presentation and literature review. *J Pediatr Surg* 2012;47:e9-13.
  111. Oliveira C, Zamakhshary M, Marcon P, et al. Eosinophilic esophagitis and intermediate esophagitis after tracheoesophageal fistula repair: a case series. *J Pediatr Surg* 2008;43:810–814.
  112. Kassabian S, Baez-Socorro V, Sferra T, et al. Eosinophilic esophagitis in patients with esophageal atresia and chronic dysphagia. *World J Gastroenterol* 2014;20:18038–18043.
  113. Chan LJ, Tan L, Dhaliwal J, et al. Treatment outcomes for eosinophilic esophagitis in children with esophageal atresia. *Dis Esophagus* 2016;29:563–571.
  114. Stankiewicz P, Sen P, Bhatt SS. Genomic and genetic deletions of the FOX gene cluster on 16q24.1 and inactivating mutations of FOXF1 cause alveolar capillary dysplasia and other malformations. *Am J Hum Genet* 2009;84:790–791.
  115. Costa RH, Kalinichenko VV, Lim. Transcription factors in mouse lung development and function. *Am J Physiol Cell Mol Physiol* 2001;80:L823-L838.
  116. Abonia JP, Wen T, Stucke EM, et al. High prevalence of eosinophilic esophagitis in patients with inherited connective tissue disorders. *J Allergy Clin Immunol* 2013;132:378–386.
  117. Rothenberg ME. Molecular, genetic, and cellular bases for treating eosinophilic esophagitis. *Gastroenterology* 2015;148:1143–1157.
  118. Remedios M, Campbell C, Jones DM, et al. Eosinophilic esophagitis in adults: clinical, endoscopic, histologic findings, and response to treatment with fluticasone propionate. *Gastrointest Endosc* 2006;63:3–12.
  119. Croese J, Fairley SK, Masson JW, et al. Clinical and endoscopic features of eosinophilic esophagitis in adults. *Gastrointest Endosc* 2003;58:516–522.
  120. Kahn J, Bussmann C, Beglinger C, et al. Exercise-induced chest pain: an atypical manifestation of eosinophilic esophagitis. *Am J Med* 2015;128:196–199.
  121. Gonsalves N, Policarpio-Nicolas M, Zhang Q, et al. Histopathologic variability

- and endoscopic correlates in adults with eosinophilic esophagitis. *Gastrointest Endosc* 2006;64:313–319.
122. Shah A, Kagalwalla AF, Gonsalves N, et al. Histopathologic variability in children with eosinophilic esophagitis. *Am J Gastroenterol* 2009;104:716–721.
  123. Peery AF, Cao H, Dominik R, et al. Variable reliability of endoscopic findings with white-light and narrow-band imaging for patients with suspected eosinophilic esophagitis. *Clin Gastroenterol Hepatol* 2011;9:475–480.
  124. Dellon ES, Speck O, Woodward K. The patchy nature of esophageal eosinophilia in eosinophilic esophagitis: Insights from pathology samples from a clinical trial. *Gastroenterology* 2012;142(Suppl):Su-1129.
  125. Saffari H, Peterson KA, Fang JC, et al. Patchy eosinophil distributions in an esophagectomy specimen from a patient with eosinophilic esophagitis: Implications for endoscopic biopsy. *J Allergy Clin Immunol* 2012;130:798–800.
  126. Gupta SK, Fitzgerald JF, Chong SK, et al. Vertical lines in distal esophageal mucosa (VLEM): a true endoscopic manifestation of esophagitis in children? *Gastrointest Endosc* 1997;45:485–489.
  127. Lim JR, Gupta SK, Croffie JM, et al. White specks in the esophageal mucosa: An endoscopic manifestation of non-reflux eosinophilic esophagitis in children. *Gastrointest Endosc* 2004;59:835–388.
  128. Straumann A, Spichtin H-P, Bucher KA, et al. Eosinophilic esophagitis: red on microscopy, white on endoscopy. *Digestion* 2004;70:109–116.
  129. Nielsen JA, Lager DJ, Lewin M, et al. The optimal number of biopsy fragments to establish a morphologic diagnosis of eosinophilic esophagitis. *Am J Gastroenterol* 2014;109:515–520.
  130. Salek J, Clayton F, Vinson L, et al. Endoscopic appearance and location dictate diagnostic yield of biopsies in eosinophilic oesophagitis. *Aliment Pharmacol Ther* 2015;41:1288–1295.
  131. Kim HP, Vance RB, Shaheen NJ, et al. The prevalence and diagnostic utility of endoscopic features of eosinophilic esophagitis: a meta-analysis. *Clin Gastroenterol Hepatol* 2012;10:988–996.
  132. Dellon ES, Aderoju A, Woosley JT, et al. Variability in diagnostic criteria for eosinophilic esophagitis: a systematic review. *Am J Gastroenterol* 2007;102:2300–2313.
  133. Peery AF, Shaheen NJ, Dellon ES. Practice patterns for the evaluation and treatment of eosinophilic oesophagitis. *Aliment Pharmacol Ther* 2010;32:1373–1382.
  134. Sperry SLW, Shaheen NJ, Dellon ES. Toward uniformity in the diagnosis of eosinophilic esophagitis (EoE): the effect of guidelines on variability of diagnostic criteria for EoE. *Am J Gastroenterol* 2011;106:824–832.
  135. Steiner SJ, Gupta SK, Croffie JM, et al. Correlation between number of



- eosinophils and reflux index on same day esophageal biopsy and 24 hour esophageal pH monitoring. *Am J Gastroenterol* 2004;99:801–805.
136. Genevay M, Rubbia-Brandt L, Rougemont A-L. Do eosinophil numbers differentiate eosinophilic esophagitis from gastroesophageal reflux disease? *Arch Pathol Lab Med* 2010;134:815–825.
  137. Fiocca R, Mastracci L, Engström C, et al. Long-term outcome of microscopic esophagitis in chronic GERD patients treated with esomeprazole or laparoscopic antireflux surgery in the LOTUS trial. *Am J Gastroenterol* 2010;105:1015-1023.
  138. Rodrigo S, Abboud G, Oh D, et al. High intraepithelial eosinophil counts in esophageal squamous epithelium are not specific for eosinophilic esophagitis in adults. *Am J Gastroenterol* 2008;103:435–442.
  139. Parfitt JR, Gregor JC, Suskin NG, et al. Eosinophilic esophagitis in adults: distinguishing features from gastroesophageal reflux disease: a study of 41 patients. *Mod Pathol an Off J United States Can Acad Pathol Inc* 2006;19:90–96.
  140. Dellon ES, Speck O, Woodward K, et al. Distribution and variability of esophageal eosinophilia in patients undergoing upper endoscopy. *Mod Pathol* 2015;28:383–390.
  141. Mueller S, Neureiter D, Aigner T, et al. Comparison of histological parameters for the diagnosis of eosinophilic oesophagitis versus gastro-oesophageal reflux disease on oesophageal biopsy material. *Histopathology* 2008;53:676–684.
  142. Protheroe C, Woodruff SA, de Petris G, et al. A novel histologic scoring system to evaluate mucosal biopsies from patients with eosinophilic esophagitis. *Clin Gastroenterol Hepatol* 2009;7:749–755.
  143. Aceves SS. Tissue remodeling in patients with eosinophilic esophagitis: what lies beneath the surface? *J Allergy Clin Immunol* 2011;128:1047–1049.
  144. Dellon ES, Chen X, Miller CR, et al. Tryptase staining of mast cells may differentiate eosinophilic esophagitis from gastroesophageal reflux disease. *Am J Gastroenterol* 2011;106:264–271.
  145. Saffari H, Hoffman LH, Peterson KA, et al. Electron microscopy elucidates eosinophil degranulation patterns in patients with eosinophilic esophagitis. *J Allergy Clin Immunol* 2014;133:1728–1734.
  146. Capocelli KE, Fernando SD, Menard-Katcher C, et al. Ultrastructural features of eosinophilic oesophagitis: impact of treatment on desmosomes. *J Clin Pathol* 2015;68:51–56.
  147. Ravelli A, Villanacci V, Cadei M, et al. Dilated intercellular spaces in eosinophilic esophagitis. *J Pediatr Gastroenterol Nutr* 2014;59:589–593.
  148. Simon D, Radonjic-Hosli S, Straumann A, et al. Active eosinophilic esophagitis is characterized by epithelial barrier defects and eosinophil extracellular trap formation. *Allergy* 2015;70:443–452.

149. Collins MH. Histopathologic features of eosinophilic esophagitis and eosinophilic gastrointestinal diseases. *Gastroenterol Clin North Am* 2014;43:257–268.
150. Collins MH, Martin LJ, Alexander ES, et al. Newly developed and validated eosinophilic esophagitis histology scoring system and evidence that it outperforms peak eosinophil count for disease diagnosis and monitoring. *Dis Esophagus*. 2016 Feb; doi: 10.1111/dote.12470.
151. Aceves SS, Newbury RO, Chen D, et al. Resolution of remodeling in eosinophilic esophagitis correlates with epithelial response to topical corticosteroids. *Allergy* 2010;65:109–116.
152. Lieberman JA, Morotti RA, Konstantinou GN, et al. Dietary therapy can reverse esophageal subepithelial fibrosis in patients with eosinophilic esophagitis: a historical cohort. *Allergy* 2012;67:1299–1307.
153. Rajan J, Newbury RO, Anilkumar A, et al. Long-term assessment of esophageal remodeling in patients with pediatric eosinophilic esophagitis treated with topical corticosteroids. *J Allergy Clin Immunol* 2016;137:147–156.
154. Kagalwalla AF, Akhtar N, Woodruff SA, et al. Eosinophilic esophagitis: epithelial mesenchymal transition contributes to esophageal remodeling and reverses with treatment. *J Allergy Clin Immunol* 2012;129:1387–1396.
155. Baxi S, Gupta SK, Swigonski N, et al. Clinical presentation of patients with eosinophilic inflammation of the esophagus. *Gastrointest Endosc* 2006;64:473–478.
156. Konikoff MR, Blanchard C, Kirby C, et al. Potential of blood eosinophils, eosinophil-derived neurotoxin, and eotaxin-3 as biomarkers of eosinophilic esophagitis. *Clin Gastroenterol Hepatol* 2006;4:1328–1336.
157. Straumann A, Conus S, Degen L, et al. Budesonide is effective in adolescent and adult patients with active eosinophilic esophagitis. *Gastroenterology* 2010;139:1526–1537.
158. Filik L. Montelukast and maintenance of steroid-induced remission in eosinophilic esophagitis. *Dig Dis Sci* 2012;57:258–259.
159. Rodriguez-Sanchez J, Gomez-Torrijos E, de-la-Santa-Belda E, et al. Effectiveness of serological markers of eosinophil activity in monitoring eosinophilic esophagitis. *Rev Esp Enferm Dig* 2013;105:462–467.
160. Schlag C, Miehke S, Heiseke A, et al. Peripheral blood eosinophils and other non-invasive biomarkers can monitor treatment response in eosinophilic oesophagitis. *Aliment Pharmacol Ther* 2015;42:1122–1130.
161. Min SB, Nylund CM, Baker TP, et al. Longitudinal Evaluation of Noninvasive Biomarkers for Eosinophilic Esophagitis. *J Clin Gastroenterol* 2016 Jul; DOI: 10.1097/MCG.0000000000000621.
162. Rao GS, Mitchell L, Ohnuki JF, et al. Can eosinophil derived neurotoxin (EDN)

act as a surrogate marker of disease activity in children with allergic eosinophilic esophagitis (AEE)? *Gastrointest Endosc* 2004;59:P103.

163. Leung J, Nguyen-Traxler A, Lee EM, et al. Assessment of fractionated exhaled nitric oxide as a biomarker for the treatment of eosinophilic esophagitis. *Allergy Asthma Proc* 2012;33:519–524.
164. Dellon ES, Rusin S, Gebhart JH, et al. Utility of a noninvasive serum biomarker panel for diagnosis and monitoring of eosinophilic esophagitis: a prospective study. *Am J Gastroenterol* 2015;110:821–827.
165. Furuta GT, Kagalwalla AF, Lee JJ, et al. The oesophageal string test: a novel, minimally invasive method measures mucosal inflammation in eosinophilic oesophagitis. *Gut* 2013;62:1395–1405.
166. Katzka DA, Geno DM, Ravi A, et al. Accuracy, safety, and tolerability of tissue collection by Cytosponge vs endoscopy for evaluation of eosinophilic esophagitis. *Clin Gastroenterol Hepatol* 2015;13:77–83.
167. Schoepfer A, Safroneeva E, Straumann A. How to measure disease activity in eosinophilic esophagitis. *Dis Esophagus*. 2015 Jul; doi: 10.1111/dote.12391.
168. Alexander JA, Jung KW, Arora AS, et al. Swallowed fluticasone improves histologic but not symptomatic response of adults with eosinophilic esophagitis. *Clin Gastroenterol Hepatol* 2012;10:742–749.
169. Gupta SK, Vitanza JM, Collins MH. Efficacy and safety of oral budesonide suspension in pediatric patients with eosinophilic esophagitis. *Clin Gastroenterol Hepatol* 2015;13:66–76.
170. Dohil R, Newbury R, Fox L, et al. Oral viscous budesonide is effective in children with eosinophilic esophagitis in a randomized, placebo-controlled trial. *Gastroenterology* 2010;139:418–429.
171. Schoepfer AM, Straumann A, Panczak R, et al. Development and validation of a symptom-based activity index for adults with eosinophilic esophagitis. *Gastroenterology* 2014;147:1255–1266.
172. Safroneeva E, Straumann A, Coslovsky M, et al. Symptoms have modest accuracy in detecting endoscopic and histologic remission in adults with eosinophilic esophagitis. *Gastroenterology* 2016;150:581–590.
173. Dellon ES, Irani A-M, Hill MR, et al. Development and field testing of a novel patient-reported outcome measure of dysphagia in patients with eosinophilic esophagitis. *Aliment Pharmacol Ther* 2013;38:634–642.
174. Franciosi JP, Hommel KA, DeBrosse CW, et al. Development of a validated patient-reported symptom metric for pediatric eosinophilic esophagitis: qualitative methods. *BMC Gastroenterol* 2011;11:126.
175. Martin LJ, Franciosi JP, Collins MH, et al. Pediatric Eosinophilic Esophagitis Symptom Scores (PEESS v2.0) identify histologic and molecular correlates of the key clinical features of disease. *J Allergy Clin Immunol* 2015;135:1519–1528.

176. Taft TH, Kern E, Kwiatek MA, et al. The adult eosinophilic oesophagitis quality of life questionnaire: a new measure of health-related quality of life. *Aliment Pharmacol Ther* 2011;34:790–798.
177. Franciosi JP, Hommel KA, Bendo CB, et al. PedsQL eosinophilic esophagitis module: Feasibility, reliability and validity. *J Pediatr Gastroenterol Nutr* 2013;57:57-66.
178. Kwiatek MA, Hirano I, Kahrilas PJ, et al. Mechanical properties of the esophagus in eosinophilic esophagitis. *Gastroenterology* 2011;140:82–90.
179. Nicodeme F, Hirano I, Chen J, et al. Esophageal distensibility as a measure of disease severity in patients with eosinophilic esophagitis. *Clin Gastroenterol Hepatol* 2013;11:1101–1107.
180. French comment on article: Severity of endoscopically identified esophageal rings correlates with reduced esophageal distensibility in eosinophilic esophagitis. *Endoscopy* 2016;48:873.
181. Hirano I, Moy N, Heckman MG, et al. Endoscopic assessment of the oesophageal features of eosinophilic oesophagitis: validation of a novel classification and grading system. *Gut* 2013;62:489–495.
182. Dellon ES, Cotton CC, Gebhart JH, et al. Accuracy of the eosinophilic esophagitis endoscopic reference score in diagnosis and determining response to treatment. *Clin Gastroenterol Hepatol* 2016;14:31–39.
183. van Rhijn BD, Warners MJ, Curvers WL, et al. Evaluating the endoscopic reference score for eosinophilic esophagitis: moderate to substantial intra- and interobserver reliability. *Endoscopy* 2014;46:1049–1055.
184. van Rhijn BD, Verheij J, Smout AJ, et al. The Endoscopic Reference Score shows modest accuracy to predict histologic remission in adult patients with eosinophilic esophagitis. *Neurogastroenterol Motil* 2016;28:1714-1722.
185. Assa'ad AH, Putnam PE, Collins MH, et al. Pediatric patients with eosinophilic esophagitis: an 8-year follow-up. *J Allergy Clin Immunol* 2007;119:731–738.
186. Menard-Katcher P, Marks KL, Liacouras CA, et al. The natural history of eosinophilic oesophagitis in the transition from childhood to adulthood. *Aliment Pharmacol Ther* 2013;37:114–121.
187. Helou EF, Simonson J, Arora AS. 3-yr-follow-up of topical corticosteroid treatment for eosinophilic esophagitis in adults. *Am J Gastroenterol* 2008;103:2194–2199.
188. Schoepfer AM, Safroneeva E, Bussmann C, et al. Delay in diagnosis of eosinophilic esophagitis increases risk for stricture formation in a time-dependent manner. *Gastroenterology* 2013;145:1230–1232.
189. Lipka S, Kumar A, Richter JE. Impact of Diagnostic Delay and Other Risk Factors on Eosinophilic Esophagitis Phenotype and Esophageal Diameter. *J Clin Gastroenterol* 2016;50:134–140.

190. van Rhijn BD, Oors JM, Smout AJ, et al. Prevalence of esophageal motility abnormalities increases with longer disease duration in adult patients with eosinophilic esophagitis. *Neurogastroenterol Motil* 2014;26:1349–1355.
191. Lucendo AJ, Arias A, De Rezende LC, et al. Subepithelial collagen deposition, profibrogenic cytokine gene expression, and changes after prolonged fluticasone propionate treatment in adult eosinophilic esophagitis: a prospective study. *J Allergy Clin Immunol* 2011;128:1037–1046.
192. Dellon ES, Kim HP, Sperry SL, et al. A phenotypic analysis shows that eosinophilic esophagitis is a progressive fibrostenotic disease. *Gastrointest Endosc* 2014;79:577–585.
193. Klinnert MD. Psychological impact of eosinophilic esophagitis on children and families. *Immunol Allergy Clin North Am* 2009;29:99–107.
194. Harris RF, Menard-Katcher C, Atkins D, et al. Psychosocial dysfunction in children and adolescents with eosinophilic esophagitis. *J Pediatr Gastroenterol Nutr* 2013;57:500–505.
195. Klinnert MD, Silveira L, Harris R, et al. Health-related quality of life over time in children with eosinophilic esophagitis and their families. *J Pediatr Gastroenterol Nutr* 2014;59:308–316.
196. DeBrosse CW, Franciosi JP, King EC, et al. Long-term outcomes in pediatric-onset esophageal eosinophilia. *J Allergy Clin Immunol* 2011;128:132–138.
197. Taft TH, Kern E, Keefer L, et al. Qualitative assessment of patient-reported outcomes in adults with eosinophilic esophagitis. *J Clin Gastroenterol* 2011;45:769–774.
198. Safroneeva E, Coslovsky M, Kuehni CE, et al. Eosinophilic oesophagitis: relationship of quality of life with clinical, endoscopic and histological activity. *Aliment Pharmacol Ther* 2015;42:1000–1010.
199. Jingsheng Z, Yuncheng L, Yingye M, et al. The mural form of eosinophilic esophagitis is accompanied by superficial esophageal squamous cell carcinoma. *Case Rep Pathol* 2012;2012:315428.
200. Fassan M, Castoro C, Saenz AJ, et al. Inflammatory myofibroblastic tumor as adverse outcome of eosinophilic esophagitis. *Endoscopy* 2009;41(Suppl 2):E95-E96.
201. Morrow JB, Vargo JJ, Goldblum JR, et al. The ringed esophagus: histological features of GERD. *Am J Gastroenterol* 2001;96:984–989.
202. Wolfsen HC, Hemminger LL, Achem SR. Eosinophilic esophagitis and Barrett's esophagus with dysplasia. *Clin Gastroenterol Hepatol* 2007;5:A18.
203. Francalanci P, De Angelis P, Minnei F, et al. Eosinophilic esophagitis and Barrett's esophagus: An occasional association or an overlap disease? Esophageal "double trouble" in two children. *Digestion* 2008;77:16–19.
204. Mukkada V, Atkins D, Furuta GT. Uncertain association of Barrett's esophagus

- with eosinophilic esophagitis. *Clin Gastroenterol Hepatol* 2008; 6: 832.
205. Ravi K, Katzka DA, Smyrk TC, et al. Prevalence of esophageal eosinophils in patients with Barrett's esophagus. *Am J Gastroenterol* 2011;106:851–857.
  206. Owens VL, Katzka DA, Lutzke LS, et al. Endoscopic ablative therapy for Barrett's esophagus: a potential cause of eosinophilic esophagitis. *Dis Esophagus* 2012;25:33–39.
  207. Lipka S, Keshishian J, Boyce HW, et al. The natural history of steroid-naive eosinophilic esophagitis in adults treated with endoscopic dilation and proton pump inhibitor therapy over a mean duration of nearly 14 years. *Gastrointest Endosc* 2014;80:592–598.
  208. Denning KL, Al-Subu A, Elitsur Y. Immunoreactivity of p53 and Ki-67 for dysplastic changes in children with eosinophilic esophagitis. *Pediatr Dev Pathol* 2013;16:331–336.
  209. Ngo P, Furuta GT, Antonioli DA, et al. Eosinophils in the esophagus--peptic or allergic eosinophilic esophagitis? Case series of three patients with esophageal eosinophilia. *Am J Gastroenterol* 2006;101:1666–1670.
  210. Dranove JE, Horn DS, Davis MA, et al. Predictors of response to proton pump inhibitor therapy among children with significant esophageal eosinophilia. *J Pediatr* 2009;154:96–100.
  211. Moawad FJ, Veerappan GR, Dias JA, et al. Randomized controlled trial comparing aerosolized swallowed fluticasone to esomeprazole for esophageal eosinophilia. *Am J Gastroenterol* 2013;108:366–372.
  212. Peterson KA, Thomas KL, Hilden K, et al. Comparison of esomeprazole to aerosolized, swallowed fluticasone for eosinophilic esophagitis. *Dig Dis Sci* 2010;55:1313–1319.
  213. Molina-Infante J, Katzka DA, Gisbert JP. Review article: proton pump inhibitor therapy for suspected eosinophilic oesophagitis. *Aliment Pharmacol Ther* 2013;37:1157–1164.
  214. Gutierrez-Junquera C, Fernandez-Fernandez S, Cilleruelo ML, et al. High prevalence of response to proton-pump inhibitor treatment in children with esophageal eosinophilia. *J Pediatr Gastroenterol Nutr* 2016;62:704–710.
  215. Lucendo AJ, Arias A, Molina-Infante J. Efficacy of proton pump inhibitor drugs for inducing clinical and histologic remission in patients with symptomatic esophageal eosinophilia: a systematic review and meta-analysis. *Clin Gastroenterol Hepatol* 2016;14:13–22.
  216. Dellon ES, Liacouras CA. Advances in clinical management of eosinophilic esophagitis. *Gastroenterology* 2014;147:1238–1254.
  217. Dohil R, Newbury RO, Aceves S. Transient PPI responsive esophageal eosinophilia may be a clinical sub-phenotype of pediatric eosinophilic esophagitis. *Dig Dis Sci* 2012;57:1413–1419.

218. Schroeder S, Capocelli KE, Masterson JC, et al. Effect of proton pump inhibitor on esophageal eosinophilia. *J Pediatr Gastroenterol Nutr* 2013;56:166–172.
219. Molina-Infante J, Rodriguez-Sanchez J, Martinek J, et al. Long-term loss of response in proton pump inhibitor-responsive esophageal eosinophilia is uncommon and influenced by CYP2C19 genotype and rhinoconjunctivitis. *Am J Gastroenterol* 2015;110:1567–1575.
220. Gomez-Torrijos E, Garcia-Rodriguez R, Castro-Jimenez A, et al. The efficacy of step-down therapy in adult patients with proton pump inhibitor-responsive oesophageal eosinophilia. *Aliment Pharmacol Ther* 2016;43:534–540.
221. Schaefer ET, Fitzgerald JF, Molleston JP, et al. Comparison of oral prednisone and topical fluticasone in the treatment of eosinophilic esophagitis: a randomized trial in children. *Clin Gastroenterol Hepatol* 2008;6:165–173.
222. Konikoff MR, Noel RJ, Blanchard C, et al. A randomized, double-blind, placebo-controlled trial of fluticasone propionate for pediatric eosinophilic esophagitis. *Gastroenterology* 2006;131:1381–1391.
223. Dellon ES, Sheikh A, Speck O, et al. Viscous topical is more effective than nebulized steroid therapy for patients with eosinophilic esophagitis. *Gastroenterology* 2012;143:321–324.
224. Butz BK, Wen T, Gleich GJ, et al. Efficacy, dose reduction, and resistance to high-dose fluticasone in patients with eosinophilic esophagitis. *Gastroenterology* 2014;147:324–333.
225. Miehleke S, Hruz P, Vieth M, et al. A randomised, double-blind trial comparing budesonide formulations and dosages for short-term treatment of eosinophilic oesophagitis. *Gut* 2016;65:390–399.
226. Tan N Di, Xiao YL, Chen MH. Steroids therapy for eosinophilic esophagitis: Systematic review and meta-analysis. *J Dig Dis* 2015;16:431–442.
227. Sawas T, Dhalla S, Sayyar M, et al. Systematic review with meta-analysis: pharmacological interventions for eosinophilic oesophagitis. *Aliment Pharmacol Ther* 2015;41:797–806.
228. Murali AR, Gupta A, Attar BM, et al. Topical steroids in eosinophilic esophagitis: systematic review and meta-analysis of placebo controlled randomized clinical trials. *J Gastroenterol Hepatol* 2015; 31:1111-1119.
229. Chuang M-YA, Chinnaratha MA, Hancock DG, et al. Topical steroid therapy for the treatment of eosinophilic esophagitis (EoE): a systematic review and meta-analysis. *Clin Transl Gastroenterol* 2015;6:e82.
230. Straumann A, Conus S, Degen L, et al. Long-term budesonide maintenance treatment is partially effective for patients with eosinophilic esophagitis. *Clin Gastroenterol Hepatol* 2011;9:400–409.
231. Andreae DA, Hanna MG, Magid MS, et al. Swallowed fluticasone propionate is an effective long-term maintenance therapy for children with eosinophilic esophagitis. *Am J Gastroenterol* 2016;111:1187–1197.

232. Philla KQ, Min SB, Hefner JN, et al. Swallowed glucocorticoid therapy for eosinophilic esophagitis in children does not suppress adrenal function. *J Pediatr Endocrinol Metab* 2015;28:1101–1106.
233. Golekoh MC, Hornung LN, Mukkada VA, et al. Adrenal insufficiency after chronic swallowed glucocorticoid therapy for eosinophilic esophagitis. *J Pediatr* 2016;170:240–245.
234. Harel S, Hursh BE, Chan ES, et al. Adrenal suppression in children treated with oral viscous budesonide for eosinophilic esophagitis. *J Pediatr Gastroenterol Nutr* 2015;61:190–193.
235. Markowitz JE, Spergel JM, Ruchelli E, et al. Elemental diet is an effective treatment for eosinophilic esophagitis in children and adolescents. *Am J Gastroenterol* 2003;98:777–782.
236. Kagalwalla AF, Sentongo TA, Ritz S, et al. Effect of six-food elimination diet on clinical and histologic outcomes in eosinophilic esophagitis. *Clin Gastroenterol Hepatol* 2006;4:1097–1102.
237. Henderson CJ, Abonia JP, King EC, et al. Comparative dietary therapy effectiveness in remission of pediatric eosinophilic esophagitis. *J Allergy Clin Immunol* 2012;129:1570–1578.
238. Peterson KA, Byrne KR, Vinson LA, et al. Elemental diet induces histologic response in adult eosinophilic esophagitis. *Am J Gastroenterol* 2013;108:759–766.
239. Arias A, Gonzalez-Cervera J, Tenias JM, et al. Efficacy of dietary interventions for inducing histologic remission in patients with eosinophilic esophagitis: a systematic review and meta-analysis. *Gastroenterology* 2014;146:1639–1648.
240. Molina-Infante J, Lucendo AJ. Update on topical steroid therapy for eosinophilic esophagitis. *Gastroenterol Hepatol* 2015;38:388–397.
241. Franciosi JP, Hommel KA, DeBrosse CW, et al. Quality of life in paediatric eosinophilic oesophagitis: what is important to patients? *Child Care Health Dev.* 2012;38:477–483.
242. Lucendo AJ, Sanchez-Cazalilla M, Molina-Infante J, et al. Transcultural adaptation and validation of the “Adult Eosinophilic Esophagitis Quality of Life Questionnaire” into Spanish. *Rev Esp Enferm Dig* 2014;106:386–394.
243. Peterson KA, Boynton KK. Which patients with eosinophilic esophagitis (EoE) should receive elemental diets versus other therapies? *Curr Gastroenterol Rep* 2014;16:364.
244. Spergel JM, Beausoleil JL, Mascarenhas M, et al. The use of skin prick tests and patch tests to identify causative foods in eosinophilic esophagitis. *J Allergy Clin Immunol* 2002;109:363–368.
245. Spergel JM, Brown-Whitehorn TF, Cianferoni A, et al. Identification of causative foods in children with eosinophilic esophagitis treated with an elimination diet. *J Allergy Clin Immunol* 2012;130:461–467.



246. Kagalwalla AF, Shah A, Ritz S, et al. Cow's milk protein-induced eosinophilic esophagitis in a child with gluten-sensitive enteropathy. *J Pediatr Gastroenterol Nutr* 2007;44:386–388.
247. Wolf WA, Jerath MR, Sperry SLW, et al. Dietary elimination therapy is an effective option for adults with eosinophilic esophagitis. *Clin Gastroenterol Hepatol* 2014;12:1272–1279.
248. Molina-Infante J, Martin-Noguerol E, Alvarado-Arenas M, et al. Selective elimination diet based on skin testing has suboptimal efficacy for adult eosinophilic esophagitis. *J Allergy Clin Immunol* 2012;130:1200–1202.
249. van Rhijn BD, Vlieg-Boerstra BJ, Versteeg SA, et al. Evaluation of allergen-microarray-guided dietary intervention as treatment of eosinophilic esophagitis. *J Allergy Clin Immunol* 2015;136:1095–1097.
250. Philpott H, Nandurkar S, Royce SG, et al. Allergy tests do not predict food triggers in adult patients with eosinophilic oesophagitis. A comprehensive prospective study using five modalities. *Aliment Pharmacol Ther* 2016 ;44:223–233.
251. Boyce JA, Assa'ad A, Burks AW, et al. Guidelines for the diagnosis and management of food allergy in the United States: summary of the NIAID-sponsored expert panel report. *J Allergy Clin Immunol* 2010;126:1105–1118.
252. Heine RG, Verstege A, Mehl A, et al. Proposal for a standardized interpretation of the atopy patch test in children with atopic dermatitis and suspected food allergy. *Pediatr Allergy Immunol* 2006;17:213–217.
253. Hong S, Vogel NM. Food allergy and eosinophilic esophagitis: learning what to avoid. *Cleve Clin J Med* 2010;77:51–59.
254. Muraro A, Werfel T, Hoffmann-Sommergruber K. EAACI food allergy and anaphylaxis guidelines: diagnosis and management of food allergy. *Allergy*. 2014;69:1008–1025.
255. Simon D, Cianferoni A, Spergel JM, et al. Eosinophilic esophagitis is characterized by a non-IgE-mediated food hypersensitivity. *Allergy* 2016;71:611–620.
256. Clayton F, Fang JC, Gleich GJ, et al. Eosinophilic esophagitis in adults is associated with IgG4 and not mediated by IgE. *Gastroenterology* 2014;147:602–609.
257. Wright BL, Kulis M, Guo R, et al. Food-specific IgG4 is associated with eosinophilic esophagitis. *J Allergy Clin Immunol* 2016;138:1190-1192.
258. Aalberse RC, Platts-Mills TA, Rispens T. The developmental history of IgE and IgG4 antibodies in relation to atopy, eosinophilic esophagitis, and the modified TH2 response. *Curr Allergy Asthma Rep* 2016;16:45.
259. Sicherer SH, Leung DY, Advances in allergic skin disease, anaphylaxis, and hypersensitivity reactions to foods, drugs and insects in 2014. *J Allergy Clin Immunol* 2015;135:357–367.

260. Kagalwalla AF, Shah A, Li BUK, et al. Identification of specific foods responsible for inflammation in children with eosinophilic esophagitis successfully treated with empiric elimination diet. *J Pediatr Gastroenterol Nutr* 2011;53:145–149.
261. Molina-Infante J, Arias A, Barrio J, et al. Four-food group elimination diet for adult eosinophilic esophagitis: A prospective multicenter study. *J Allergy Clin Immunol* 2014;134:1093–1099.
262. Kagalwalla A, Amsden K, Makhija MM, et al. A multicenter study assessing the clinical, endoscopic and histologic response to four food elimination diet for the treatment of eosinophilic esophagitis. *Gastroenterology* 2015;148(Suppl 1):S-30.
263. Kagalwalla AF, Amsden K, Shah A, et al. Cow's milk elimination: a novel dietary approach to treat eosinophilic esophagitis. *J Pediatr Gastroenterol Nutr* 2012;55:711–716.
264. Kruszewski PG, Russo JM, Franciosi JP, et al. Prospective, comparative effectiveness trial of cow's milk elimination and swallowed fluticasone for pediatric eosinophilic esophagitis. *Dis Esophagus* 2016;29:377–384.
265. Molina-Infante J, Modolell I, Alcedo J, et al. Step-up empiric elimination diet for pediatric and adult eosinophilic esophagitis: the 2-4-6 study. *United Eur Gastroenterol J.* 2016;(Suppl 5):A126.
266. Lucendo AJ. Meta-Analysis-Based Guidance for Dietary Management in Eosinophilic Esophagitis. *Curr Gastroenterol Rep* 2015;17:464.
267. Doerfler B, Bryce P, Hirano I, et al. Practical approach to implementing dietary therapy in adults with eosinophilic esophagitis: the Chicago experience. *Dis Esophagus* 2015;28:42–58.
268. Colson D, Kalach N, Soulaines P, et al. The impact of dietary therapy on clinical and biologic parameters of pediatric patients with eosinophilic esophagitis. *J Allergy Clin Immunol Pract* 2014;2:587–593.
269. Moawad FJ, Cheatham JG, DeZee KJ. Meta-analysis: the safety and efficacy of dilation in eosinophilic oesophagitis. *Aliment Pharmacol Ther* 2013;38:713–720.
270. Schoepfer AM, Gonsalves N, Bussmann C, et al. Esophageal dilation in eosinophilic esophagitis: effectiveness, safety, and impact on the underlying inflammation. *Am J Gastroenterol* 2010;105:1062–1070.
271. Dellon ES, Gibbs WB, Rubinas TC, et al. Esophageal dilation in eosinophilic esophagitis: safety and predictors of clinical response and complications. *Gastrointest Endosc* 2010;71:706–712.
272. Potter JW, Saeian K, Staff D, et al. Eosinophilic esophagitis in adults: an emerging problem with unique esophageal features. *Gastrointest Endosc* 2004;59:355–361.
273. Pasha SF, DiBaise JK, Kim HJ, et al. Patient characteristics, clinical, endoscopic, and histologic findings in adult eosinophilic esophagitis: a case series and systematic review of the medical literature. *Dis Esophagus* 2007;20:311–319.

274. Robles-Medranda C, Villard F, le Gall C, et al. Severe dysphagia in children with eosinophilic esophagitis and esophageal stricture: an indication for balloon dilation? *J Pediatr Gastroenterol Nutr* 2010;50:516–520.
275. Jung KW, Gundersen N, Kopacova J, et al. Occurrence of and risk factors for complications after endoscopic dilation in eosinophilic esophagitis. *Gastrointest Endosc* 2011;73:15–21.
276. Standards of Practice Committee, Egan JV, Baron TH, et al. Esophageal dilation. *Gastrointest Endosc* 2006;63:755–760.
277. Molina-Infante J, Lucendo AJ. Eosinophilic esophagitis: a practical approach to diagnosis and management. *Expert Rev Gastroenterol Hepatol* 2014;8:925–934.
278. Netzer P, Gschossmann JM, Straumann A, et al. Corticosteroid-dependent eosinophilic oesophagitis: azathioprine and 6-mercaptopurine can induce and maintain long-term remission. *Eur J Gastroenterol Hepatol* 2007;19:865–869.
279. Abonia JP, Blanchard C, Butz BB, et al. Involvement of mast cells in eosinophilic esophagitis. *J Allergy Clin Immunol* 2010;126:140–149.
280. Arias A, Lucendo AJ, Martinez-Fernandez P, et al. Dietary treatment modulates mast cell phenotype, density, and activity in adult eosinophilic oesophagitis. *Clin Exp Allergy* 2016;46:78–91.
281. Attwood SEA, Lewis CJ, Bronder CS, et al. Eosinophilic oesophagitis: a novel treatment using Montelukast. *Gut* 2003;52:181–185.
282. Stumphy J, Al-Zubeidi D, Guerin L, Mitros F, Rahhal R. Observations on use of montelukast in pediatric eosinophilic esophagitis: insights for the future. *Dis Esophagus*. Australia; 2011 May;24(4):229–34.
283. Alexander JA, Ravi K, Enders FT, et al. Montelukast does not maintain symptom reductions following topical steroid therapy for eosinophilic esophagitis. *Clin Gastroenterol Hepatol* 2016; doi: 10.1016/j.cgh.2016.09.013.
284. Lucendo AJ, De Rezende LC, Jimenez-Contreras S, et al. Montelukast was inefficient in maintaining steroid-induced remission in adult eosinophilic esophagitis. *Dig Dis Sci* 2011;56:3551–3558.
285. Straumann A, Hoesli S, Bussmann C, et al. Anti-eosinophil activity and clinical efficacy of the CRTH2 antagonist OC000459 in eosinophilic esophagitis. *Allergy* 2013;68:375–385.
286. Straumann A, Conus S, Grzonka P, et al. Anti-interleukin-5 antibody treatment (mepolizumab) in active eosinophilic oesophagitis: a randomised, placebo-controlled, double-blind trial. *Gut* 2010;59:21–30.
287. Assa'ad AH, Gupta SK, Collins MH, et al. An antibody against IL-5 reduces numbers of esophageal intraepithelial eosinophils in children with eosinophilic esophagitis. *Gastroenterology* 2011;141:1593–1604.
288. Spergel JM, Rothenberg ME, Collins MH, et al. Reslizumab in children and adolescents with eosinophilic esophagitis: results of a double-blind, randomized,

- placebo-controlled trial. *J Allergy Clin Immunol* 2012;129:456–463.
289. Rothenberg ME, Wen T, Greenberg A, et al. Intravenous anti-IL-13 mAb QAX576 for the treatment of eosinophilic esophagitis. *J Allergy Clin Immunol* 2015;135:500–507.
  290. Rocha R, Vitor AB, Trindade E, et al. Omalizumab in the treatment of eosinophilic esophagitis and food allergy. *Eur J Pediatr* 2011;170:1471–1474.
  291. Loizou D, Enav B, Komlodi-Pasztor E, et al. A pilot study of omalizumab in eosinophilic esophagitis. *PLoS One* 2015;10:e0113483.
  292. Straumann A, Bussmann C, Conus S, et al. Anti-TNF-alpha (infliximab) therapy for severe adult eosinophilic esophagitis. *J Allergy Clin Immunol* 2008;122:425–427.

**Supplementary Table 1.** Local and systemic causes of esophageal eosinophilia to rule out before diagnosing EoE

| <b>Condition</b>                                                                    | <b>Diagnostic clues</b>                                                                                                                                                    |
|-------------------------------------------------------------------------------------|----------------------------------------------------------------------------------------------------------------------------------------------------------------------------|
| Eosinophilic gastroenteritis                                                        | Gastrointestinal symptoms + eosinophilic infiltration in stomach and/or duodenum                                                                                           |
| Crohn's disease                                                                     | Extraesophageal symptoms, inflammation and imaging                                                                                                                         |
| Infection (e.g., parasites)                                                         | Extraesophageal symptoms + serum and/or stool tests                                                                                                                        |
| Achalasia                                                                           | Regurgitation + esophageal manometry                                                                                                                                       |
| Hypereosinophilic syndrome                                                          | Peripheral blood eosinophils $>1.5 \times 10^9/L$ + eosinophil-mediated organ damage and/or dysfunction (cardiac, neurologic, skin, pulmonary or gastrointestinal disease) |
| Drug hypersensitivity                                                               | Rash, fever, lymphadenopathy and multiorgan involvement<br><br>Resolution upon drug discontinuation                                                                        |
| Vasculitis<br>Pemphigoid<br>Connective tissue disorder<br>Graft-versus-host disease | Clinical and histological context<br><br>Systemic involvement                                                                                                              |

**Supplementary Table 2.** EoEHSS definitions of the 8 esophageal biopsy features evaluated in this study and the 4 point scores that expressed the degree of abnormality (grade score) or the extent of pathology (stage score).

| <b>Histological feature</b>                                                                                                                                                                                                                                                                                                                           | <b>Grade</b>                                                                                                                    | <b>Stage</b>                                                                                                                                                                                                                  |
|-------------------------------------------------------------------------------------------------------------------------------------------------------------------------------------------------------------------------------------------------------------------------------------------------------------------------------------------------------|---------------------------------------------------------------------------------------------------------------------------------|-------------------------------------------------------------------------------------------------------------------------------------------------------------------------------------------------------------------------------|
| <p>A. Eosinophilic inflammation (EI): Intraepithelial eosinophils are not normally found in esophageal biopsies; therefore any intraepithelial eosinophils were considered abnormal. Grade score for eosinophilic inflammation was based on the quantity of eosinophils in the most inflamed high power field (HPF) (peak eosinophil count, PEC).</p> | <p>0 = intraepithelial eosinophils not present</p> <p>1 = PEC &lt;15/HPF</p> <p>2 = PEC 15-59/HPF</p> <p>3 = PEC &gt;60/HPF</p> | <p>0 = intraepithelial eosinophils 0-14/HPF,</p> <p>1 = PEC <math>\geq</math>15/HPF in &lt;33% of HPFs</p> <p>2 = PEC <math>\geq</math>15/HPF in 33-66% of HPFs</p> <p>3 = PEC <math>\geq</math>15/HPF in &gt;66% of HPFs</p> |
| <p>B. Epithelial basal zone: The basal zone of esophageal squamous epithelium is composed of closely packed small cells and normally occupies <math>\leq</math> 15% of the total</p>                                                                                                                                                                  | <p>0 = BZH not present</p>                                                                                                      | <p>0= BZH not present</p>                                                                                                                                                                                                     |

|                                                                                                                                                                                                                                                      |                                                                                                                                                                                                                           |                                                                                                                                                                              |
|------------------------------------------------------------------------------------------------------------------------------------------------------------------------------------------------------------------------------------------------------|---------------------------------------------------------------------------------------------------------------------------------------------------------------------------------------------------------------------------|------------------------------------------------------------------------------------------------------------------------------------------------------------------------------|
| <p>epithelial thickness. The upper limit of the basal zone was defined as the level at which basal epithelial cell nuclei were separated by a distance equal to or greater than the diameter of a basal cell nucleus.</p>                            | <p>1 = basal zone occupies &gt;15% but &lt;33% of total epithelial thickness</p> <p>2 = basal zone occupies 33-66% of total epithelial thickness</p> <p>3 = basal zone occupies &gt;66% of total epithelial thickness</p> | <p>1 = BZH (any grade &gt;0) in &lt;33% of epithelium</p> <p>2 = BZH (any grade &gt;0) in 33-66% of epithelium</p> <p>3 = BZH (any grade &gt;0) in &gt;66% of epithelium</p> |
| <p>C. Eosinophil abscess (EA): intraepithelial eosinophil group or aggregate in which eosinophils form solid masses and the epithelial architecture is disrupted so that adjacent eosinophils are not separated by intervening epithelial tissue</p> | <p>0 = groups or aggregates of eosinophils not present</p> <p>1 = group of 4-9 eosinophils</p>                                                                                                                            | <p>0 = groups or aggregates of eosinophils not present</p> <p>1 = EA (any grade &gt;0)</p>                                                                                   |

|                                                                                                                                                                                                                                |                                                                                                                                                    |                                                                                                                                                                       |
|--------------------------------------------------------------------------------------------------------------------------------------------------------------------------------------------------------------------------------|----------------------------------------------------------------------------------------------------------------------------------------------------|-----------------------------------------------------------------------------------------------------------------------------------------------------------------------|
|                                                                                                                                                                                                                                | <p>2 = group of 10-20 eosinophils</p> <p>3 = group of &gt;20 eosinophils</p>                                                                       | <p>in &lt;33% of epithelium</p> <p>2 = EA (any grade &gt;0) in 33-66% of epithelium</p> <p>3 = EA (any grade &gt;0) in &gt; 66% of epithelium</p>                     |
| <p>D. Eosinophil surface layering (SL): linear alignment of at least 3 eosinophils in the upper third of the epithelium parallel to the lumen. Grade score for SL was based on the number of eosinophils forming the layer</p> | <p>0 = absent SL (fewer than 3 aligned eosinophils)</p> <p>1 = SL of 3-4 eosinophils</p> <p>2 = SL of 5-10 eosinophils</p> <p>3 = SL of &gt;10</p> | <p>0 = absent SL</p> <p>1 = SL (any grade &gt;0) in &lt;33% of epithelium</p> <p>2 = SL (any grade &gt;0) in 33-66% of epithelium</p> <p>3 = SL (any grade &gt;0)</p> |



|                                                                                                                                                                                                                                                        |                                                                                                                                                                                                                                                                              |                                                                                                                                                                                                                           |
|--------------------------------------------------------------------------------------------------------------------------------------------------------------------------------------------------------------------------------------------------------|------------------------------------------------------------------------------------------------------------------------------------------------------------------------------------------------------------------------------------------------------------------------------|---------------------------------------------------------------------------------------------------------------------------------------------------------------------------------------------------------------------------|
|                                                                                                                                                                                                                                                        | eosinophils                                                                                                                                                                                                                                                                  | in >66% of epithelium.                                                                                                                                                                                                    |
| E. Dilated intercellular spaces (DIS): circumferential paracellular spaces in esophageal squamous epithelium that exhibit intercellular bridges. Grade score of DIS was based on the degree of magnification required to see the intercellular bridges | <p>0 = DIS not seen at any magnification</p> <p>1 = intercellular bridges in DIS visible at 400X magnification only</p> <p>2 = intercellular bridges in DIS visible at 200X magnification</p> <p>3 = intercellular bridges in DIS visible at 100X magnification or lower</p> | <p>0 = DIS not seen at any magnification</p> <p>1 = DIS (any grade &gt;0) in &lt;33% of epithelium</p> <p>2 = DIS (any grade &gt;0) in 33-66% of epithelium</p> <p>3 = DIS (any grade &gt;0) in &gt;66% of epithelium</p> |
| F. Surface epithelial alteration (SEA): altered tinctorial properties of surface                                                                                                                                                                       | 0 = SEA not present                                                                                                                                                                                                                                                          | 0 = SEA not present                                                                                                                                                                                                       |

|                                                                                                                                                                                                                                                               |                                                                                                                                                                            |                                                                                                                                                                              |
|---------------------------------------------------------------------------------------------------------------------------------------------------------------------------------------------------------------------------------------------------------------|----------------------------------------------------------------------------------------------------------------------------------------------------------------------------|------------------------------------------------------------------------------------------------------------------------------------------------------------------------------|
| <p>epithelium that manifest as increased (darker red) staining of surface epithelial cells, with or without associated eosinophil infiltrate.</p> <p>Grade score for SEA was based on the amount of eosinophil infiltration in altered surface epithelium</p> | <p>1= SEA without eosinophils</p> <p>2 = SEA with any eosinophils</p> <p>3 = shed altered surface epithelium admixed with numerous eosinophils consistent with exudate</p> | <p>1 = SEA (any grade &gt;0) in &lt;33% of epithelium</p> <p>2 = SEA (any grade &gt;0) in 33-66% of epithelium</p> <p>3 = SEA (any grade &gt;0) in &gt;66% of epithelium</p> |
| <p>G. Dyskeratotic epithelial cells (DEC): individual cells with deeply eosinophilic cytoplasm and round small hyperchromatic nuclei. Grade score for DEC was based on the quantity of dyskeratotic cells</p>                                                 | <p>0 = DEC not present</p> <p>1 = 1 DEC/HPF</p> <p>2 = 2-5 DEC/HPF</p> <p>3 = &gt;5 DEC/HPF</p>                                                                            | <p>0 = DEC not present</p> <p>1 = DEC (any grade &gt;0) in &lt;33% of epithelium</p> <p>2 = DEC (any grade &gt;0) in 33-66% of</p>                                           |

|                                                                                                                                                                                                                                                                                                                                                                                                                                                                                  |                                                                                                                                                                                                                                            |                                                                                                                                                                                               |
|----------------------------------------------------------------------------------------------------------------------------------------------------------------------------------------------------------------------------------------------------------------------------------------------------------------------------------------------------------------------------------------------------------------------------------------------------------------------------------|--------------------------------------------------------------------------------------------------------------------------------------------------------------------------------------------------------------------------------------------|-----------------------------------------------------------------------------------------------------------------------------------------------------------------------------------------------|
|                                                                                                                                                                                                                                                                                                                                                                                                                                                                                  |                                                                                                                                                                                                                                            | epithelium<br><br>3 = DEC (any grade >0)<br><br>in >66% of epithelium                                                                                                                         |
| H. Lamina propria fibrosis (LPF): thickened connective tissue fibers in the lamina propria. Lamina propria fibers that were arranged singly and had a diameter smaller than a basal layer nucleus were considered normal, fibers that were cohesive without increased diameter were considered abnormal, as were fibers with a diameter equal to or greater than a basal layer cell nucleus. Grade score for lamina propria fibrosis was based on the degree of fiber thickening | 0 = LPF not present<br><br>1 = fibers are cohesive and interfiber spaces cannot be demarcated<br><br>2 = fiber diameter equals the diameter of a basal cell nucleus<br><br>3 = fiber diameter exceeds the diameter of a basal cell nucleus | 0 = LPF not present<br><br>1 = LPF (any grade >0) in <33% of lamina propria<br><br>2 = LPF (any grade >0) in 33-66% of lamina propria<br><br>3 = LPF (any grade >0) in >66% of lamina propria |

The maximum possible grade or stage score for each biopsy was 24. The final score was the ratio of the sum of the assigned scores for each feature evaluated divided by the maximum possible score for that biopsy. For example, if all 8 features had maximum grade and stage scores of 3, the final score for both grade and stage would be  $24/24 = 1$ . If a feature was not evaluated, the maximum possible score was reduced by 3. Most maximum possible score reductions occurred because lamina propria was not present; if all other features were evaluable, the maximum possible score for a biopsy lacking lamina propria was reduced from 24 to 21 because 7 instead of 8 features were evaluated.

**Supplementary Table 3.** Evidence for Statements 23 (Effectiveness of proton pump inhibitor drugs for induction of histological remission EoE patients).

| Studies                                                                                                                     | Quality assessment    |               |              |             |                                     | Summary of findings |                    |              |            | Comments                                                                                                                  |
|-----------------------------------------------------------------------------------------------------------------------------|-----------------------|---------------|--------------|-------------|-------------------------------------|---------------------|--------------------|--------------|------------|---------------------------------------------------------------------------------------------------------------------------|
|                                                                                                                             | Risk of bias          | Inconsistency | Indirectness | Imprecision | Other considerations <sup>a</sup>   | Quality of evidence | Effectiveness rate | 95% CI       | Comparator |                                                                                                                           |
| Proton pump inhibitor drugs for achieving histologic remission in EoE (importance of outcome: critical for decision making) |                       |               |              |             |                                     |                     |                    |              |            |                                                                                                                           |
| Efficacy: Proportion of patients with <15 eos/hpf after therapy.                                                            |                       |               |              |             |                                     |                     |                    |              |            |                                                                                                                           |
| 1 SR (25 observational studies & 2 RCT) <sup>215</sup>                                                                      | moderate <sup>b</sup> | moderate      | none         | none        | Different drug, doses and duration  | ⊕⊕⊕⊖<br>Moderate    | 50.46 %            | 42.2 – 58.71 | NA         | 17 studies included adult patients; 11 included pediatric patients                                                        |
| Symptomatic improvement after proton pump inhibitor drugs (importance of outcome: critical for decision making)             |                       |               |              |             |                                     |                     |                    |              |            |                                                                                                                           |
| 1 SR (24 observational studies & 1 RCT) <sup>215</sup>                                                                      | moderate <sup>b</sup> | high          | none         | moderate    | Different drug, doses and duration. | ⊕⊖⊖⊖<br>Very Low    | 60.8 %             | 48.38 – 72.2 | NA         | 15 studies included adult patients; 11 included pediatric patients. No validated instruments were used to assess symptoms |

<sup>a</sup>Including publication bias.

<sup>b</sup>Mainly due to lack of blinding.

**Supplementary Table 4.** Evidence for Statement 26 (Topical corticosteroids are effective for induction of histological remission in both pediatric and adult EoE patients)

| Studies                                                                                                               | Quality assessment |               |              |                      |                                        | Other considerations <sup>a</sup> | Quality of evidence | Overall quality of evidence | Summary of findings  |                                             |  | Comments                                                           |
|-----------------------------------------------------------------------------------------------------------------------|--------------------|---------------|--------------|----------------------|----------------------------------------|-----------------------------------|---------------------|-----------------------------|----------------------|---------------------------------------------|--|--------------------------------------------------------------------|
|                                                                                                                       | Risk of bias       | Inconsistency | Indirectness | Imprecision          | Steroid therapy                        |                                   |                     |                             | Comparator (placebo) | Relative effect (95% CI)                    |  |                                                                    |
| Disease remission after topic steroid therapy (importance of outcome: critical for decision making)                   |                    |               |              |                      |                                        |                                   |                     |                             |                      |                                             |  |                                                                    |
| Efficacy of topical steroids versus placebo in inducing complete histologic remission in EoE patients                 |                    |               |              |                      |                                        |                                   | ⊕⊕⊕∅<br>Moderate    |                             |                      |                                             |  | Remission criteria varied among individual studies                 |
| 1 SR (5 RCTs) <sup>228</sup>                                                                                          | none               | none          | none         | serious <sup>b</sup> | Different drugs and doses <sup>c</sup> | ⊕⊕⊕∅<br>Moderate                  |                     | 56/95                       | 3/66                 | OR 20.81<br>(7.03 – 61.63)                  |  |                                                                    |
| 1 SR (7 RCT) <sup>227</sup>                                                                                           | none               | none          | none         | serious <sup>b</sup> | Different drugs and doses <sup>c</sup> | ⊕⊕⊕∅<br>Moderate                  |                     | 92/141                      | 4/117                | OR 33.89<br>(13.35 – 86.04)                 |  |                                                                    |
| Efficacy of swallowed fluticasone propionate versus placebo in inducing complete histologic remission in EoE patients |                    |               |              |                      |                                        |                                   | ⊕⊕∅∅<br>Low         |                             |                      |                                             |  | Remission criteria varied among individual studies                 |
| 1 SR (3 RCTs) <sup>228</sup>                                                                                          | none               | none          | none         | serious <sup>b</sup> | Different doses <sup>c</sup>           | ⊕⊕∅∅<br>Low                       |                     | 38/62                       | 1/39                 | OR 25.12<br>(1.07 – 93.44)                  |  |                                                                    |
| Efficacy of swallowed budesonide versus placebo in inducing complete histologic remission in EoE patients             |                    |               |              |                      |                                        |                                   | ⊕⊕∅∅<br>Low         |                             |                      |                                             |  | Remission criteria varied among individual studies                 |
| 1 SR (2 RCTs) <sup>228</sup>                                                                                          | none               | none          | none         | serious <sup>b</sup> | Different doses <sup>c</sup>           | ⊕⊕∅∅<br>Low                       |                     | 18/33                       | 2/27                 | OR 17.17<br>(3.66 – 80.40)                  |  |                                                                    |
| Disease improvement after topic steroid therapy (importance of outcome: critical for decision making)                 |                    |               |              |                      |                                        |                                   |                     |                             |                      |                                             |  |                                                                    |
| Efficacy of topical steroids versus placebo in inducing partial histologic remission in EoE patients                  |                    |               |              |                      |                                        |                                   | ⊕⊕⊕∅<br>Moderate    |                             |                      |                                             |  | Remission criteria varied among individual studies                 |
| 1 SR (5 RCTs) <sup>228</sup>                                                                                          | none               | moderate      | none         | serious <sup>b</sup> | Different drugs and doses <sup>c</sup> | ⊕⊕⊕∅<br>Moderate                  |                     | 95/77                       | 66/9                 | OR 32.20<br>(6.82 – 152.04)                 |  |                                                                    |
| Peak eosinophil count change after therapy with topic steroids compared to placebo                                    |                    |               |              |                      |                                        |                                   | ⊕⊕⊕∅<br>Moderate    |                             |                      |                                             |  |                                                                    |
| 1 SR (5 RCTs) <sup>229</sup>                                                                                          | none               | moderate      | none         | serious <sup>b</sup> | Different drugs and doses <sup>c</sup> | ⊕⊕⊕∅<br>Moderate                  |                     | 92 <sup>e</sup>             | 66 <sup>e</sup>      | WMD <sup>g</sup> -37.2<br>(- 56.8, -18.5)   |  |                                                                    |
| 1 SR (5 RCTs) <sup>226</sup>                                                                                          | none               | high          | none         | serious <sup>b</sup> | Different drugs and doses <sup>c</sup> | ⊕⊕∅∅<br>Low                       |                     | -130.1 <sup>f</sup>         | -9.2 <sup>f</sup>    | WMD <sup>g</sup> -60.74<br>(-89.44, -32.04) |  |                                                                    |
| Symptomatic improvement after topic steroid therapy (importance of outcome: critical for decision making)             |                    |               |              |                      |                                        |                                   |                     |                             |                      |                                             |  |                                                                    |
| Efficacy of topical steroids versus placebo in achieving symptomatic improvement in EoE patients                      |                    |               |              |                      |                                        |                                   | ⊕⊕∅∅<br>Low         |                             |                      |                                             |  | No validated instruments were used to assess symptoms <sup>d</sup> |
| 1 SR (4 RCTs) <sup>228</sup>                                                                                          | moderate           | moderate      | none         | serious <sup>b</sup> | Different drugs and doses <sup>c</sup> | ⊕⊕∅∅<br>Low                       |                     | 43/68                       | 20/51                | OR 2.72<br>(0.90 – 8.23)                    |  |                                                                    |
| 1 SR (7 RCT) <sup>227</sup>                                                                                           | moderate           | moderate      | none         | serious <sup>b</sup> | Different drugs and doses <sup>c</sup> | ⊕⊕∅∅<br>Low                       |                     | 73/122                      | 37/98                | OR 3.12<br>(1.44 – 6.75)                    |  |                                                                    |
| Efficacy of Topic steroid therapy in adults with EoE (importance of outcome: critical for decision making)            |                    |               |              |                      |                                        |                                   |                     |                             |                      |                                             |  |                                                                    |

|                                                                                                              |      |          |      |                      |                                        |                  |       |       |                         |  |                                                                    |
|--------------------------------------------------------------------------------------------------------------|------|----------|------|----------------------|----------------------------------------|------------------|-------|-------|-------------------------|--|--------------------------------------------------------------------|
| Complete histologic remission in adults, compared to placebo                                                 |      |          |      |                      |                                        | ⊕⊕⊕∅<br>Moderate |       |       |                         |  | Remission criteria varied among individual studies                 |
| 1 SR (4 RCT) <sup>226</sup>                                                                                  | none | moderate | none | serious <sup>b</sup> | Different drugs and doses <sup>e</sup> | ⊕⊕⊕∅<br>Moderate | 47/64 | 2/60  | 38.09 (7.49 – 193.72)   |  |                                                                    |
| Symptomatic improvement in adults, compared to placebo                                                       |      |          |      |                      |                                        | ⊕∅∅∅<br>Very Low |       |       |                         |  | No validated instruments were used to assess symptoms <sup>d</sup> |
| 1 SR (4 RCT) <sup>226</sup>                                                                                  | none | moderate | none | serious <sup>b</sup> | Different drugs and doses <sup>e</sup> | ⊕∅∅∅<br>Very Low | 33/60 | 14/56 | OR 2.78 (0.09 – 83.84)  |  |                                                                    |
| Efficacy of Topic steroid therapy in children with EoE (importance of outcome: critical for decision making) |      |          |      |                      |                                        |                  |       |       |                         |  |                                                                    |
| Complete histologic remission in children, compared to placebo                                               |      |          |      |                      |                                        | ⊕⊕⊕∅<br>Moderate |       |       |                         |  | Remission criteria varied among individual studies                 |
| 1 SR (4 RCT) <sup>226</sup>                                                                                  | none | moderate | none | serious <sup>b</sup> | Different drugs and doses <sup>e</sup> | ⊕⊕⊕∅<br>Moderate | 45/77 | 2/56  | OR 24.58 (6.96 – 86.77) |  |                                                                    |
| Symptomatic improvement in children, compared to placebo                                                     |      |          |      |                      |                                        | ⊕∅∅∅<br>Very Low |       |       |                         |  | No validated instruments were used to assess symptoms <sup>d</sup> |
| 1 SR (4 RCT) <sup>226</sup>                                                                                  | none | moderate | none | serious <sup>b</sup> | Different drugs and doses <sup>e</sup> | ⊕∅∅∅<br>Very Low | 47/77 | 24/56 | OR 3.12 (1.39 – 7.05)   |  |                                                                    |

<sup>a</sup>Including publication bias.

<sup>b</sup>Imprecision was rating down due to sample sizes of less than 400.

<sup>c</sup>Included budesonide (delivered both as swallowed inhalation powder and viscous solution) and fluticasone propionate inhalation powder. Budesonide doses ranged from 1 to 2 mg daily. Fluticasone propionate doses ranged between 440 and 1760 mcg/daily, administered in one or two doses.

<sup>d</sup>The studies have tested improvements in symptom by using non validated instruments.

<sup>e</sup>Expressed as average number of eosinophils in study groups after intervention.

<sup>f</sup>Expressed as average reduction in eosinophil densities (cells per high power field) after intervention.

<sup>g</sup>Weighted mean difference.

**Supplementary Table 5.** Main findings from randomized controlled trials evaluating the efficacy of topical corticosteroid therapy in inducing histologic and clinic remission of EoE.

| <b>First author, country, year of publication</b> | <b>Swallowed drug<br/>Delivery system<br/>Daily dosage<br/>Duration</b>                    | <b>Comparator<br/>Daily dosage<br/>Duration</b> | <b>Population<br/>Sample size<br/>in each arm</b> | <b>Histologic remission<br/>topical steroids,<br/>n (%),<br/>definition</b> | <b>Histologic remission<br/>comparator,<br/>n (%)</b> | <b>Clinical response<br/>topical steroids,<br/>measurement<br/>tool</b> | <b>Clinical response<br/>comparator,<br/>measurement<br/>tool</b> |
|---------------------------------------------------|--------------------------------------------------------------------------------------------|-------------------------------------------------|---------------------------------------------------|-----------------------------------------------------------------------------|-------------------------------------------------------|-------------------------------------------------------------------------|-------------------------------------------------------------------|
| Konikoff, US, 2006 <sup>1</sup>                   | Fluticasone propionate<br>Metered-dose inhaler<br>880 mcg<br>12 weeks                      | Placebo<br>12 weeks                             | Children<br>21/15                                 | 10/21 (47%)*<br><i>&lt; 1 eos/HPF</i>                                       | 1/15 (6.7%)<br><i>&lt; 1 eos/HPF</i>                  | Resolution of vomiting<br>(67%)*                                        | Resolution of vomiting<br>(27%)                                   |
| Schaefer, US, 2008 <sup>2</sup>                   | Fluticasone propionate<br>Metered-dose inhaler<br>880 mcg<br>4 weeks                       | Oral prednisone<br>1 mg/kg/day<br>4 weeks       | Children<br>40/40                                 | 18/45 (45%)<br><i>&lt; 1 eos/HPF</i>                                        | 26/45 (65%)<br><i>&lt; 1 eos/HPF</i>                  | No differences                                                          |                                                                   |
| Dohil R, US, 2010 <sup>3</sup>                    | Budesonide<br>Viscous solution<br>1 mg (< 5 feet tall)<br>2 mg (> 5 feet tall)<br>12 weeks | Placebo<br>12 weeks                             | Children<br>15/9                                  | 13/15 (86%)*<br><i>&lt; 6 eos/HPF</i>                                       | 0/9 (0%)<br><i>&lt; 6 eos/HPF</i>                     | 1.2 ± 1.87<br>Non-validated<br>symptom<br>score                         | 1.85 ± 2.67<br>Non-validated<br>symptom<br>score                  |



|                                           |                                                                     |                                                    |                              |                                                                           |                                                                         |                                            |                                            |
|-------------------------------------------|---------------------------------------------------------------------|----------------------------------------------------|------------------------------|---------------------------------------------------------------------------|-------------------------------------------------------------------------|--------------------------------------------|--------------------------------------------|
| Straumann, Switzerland, 2010 <sup>4</sup> | Budesonide Viscous suspension<br>4 mg<br>2 weeks                    | Placebo<br>2 weeks                                 | Adults<br>18/18              | 13/18 (72%)*<br><b>&lt; 5 eos/HPF</b>                                     | 2/18 (11%)<br><b>&lt; 5 eos/HPF</b>                                     | 2.22 ± 2.07*<br>Dysphagia Symptom Score    | 4.72 ± 1.96<br>Dysphagia Symptom Score     |
| Peterson, US, 2010 <sup>5</sup>           | Fluticasone propionate Metered-dose inhaler<br>880 mcg<br>8 weeks   | Esomeprazole<br>40 mg<br>8 weeks                   | Adults<br>15/15              | 2/15 (13%)<br><b>&lt; 5 eos/HPF</b>                                       | 4/15 (27%)<br><b>&lt; 5 eos/HPF</b>                                     | 1.7<br>Non-validated dysphagia scale       | 2.3<br>Non-validated dysphagia scale       |
| Dellon, US, 2012 <sup>6</sup>             | Budesonide Viscous slurry<br>2 mg<br>8 weeks                        | Budesonide Metered-dose inhaler<br>2 mg<br>8 weeks | Adults<br>11/11              | 7/11 (64%)*<br><b>&lt; 1 eos/HPF</b>                                      | 3/11 (27%)<br><b>&lt; 1 eos/HPF</b>                                     | 16 ± 17<br>Mayo Dysphagia Questionnaire    | 10 ± 12<br>Mayo Dysphagia Questionnaire    |
| Alexander, US, 2012 <sup>7</sup>          | Fluticasone propionate Metered-dose inhaler<br>1760 mcg<br>6 weeks  | Placebo<br>6 weeks                                 | Adults<br>21/21              | 13/21 (62%)<br><b>&gt; 90% reduction baseline esophageal eosinophilia</b> | 0/21 (0%)<br><b>&gt; 90% reduction baseline esophageal eosinophilia</b> | 9/21 (43%)<br>Mayo Dysphagia Questionnaire | 6/21 (28%)<br>Mayo Dysphagia Questionnaire |
| Moawad, US, 2013 <sup>8</sup>             | Fluticasone propionate Metered-dose inhaler<br>880 mcg<br>8 weeks   | Esomeprazole<br>40 mg<br>8 weeks                   | Adults<br>21/21              | 4/21 (19%)<br><b>&lt; 7 eos/HPF</b>                                       | 7/21 (33%)<br><b>&lt; 7 eos/HPF</b>                                     | 12 ± 16<br>Mayo Dysphagia Questionnaire    | 1.4 ± 4.5*<br>Mayo Dysphagia Questionnaire |
| Butz, US, 2014 <sup>9</sup>               | Fluticasone propionate Metered-dose inhaler<br>1760 mcg<br>12 weeks | Placebo<br>12 weeks                                | Children and adults<br>28/14 | 15/28 (53%)*<br><b>&lt; 1 eos/HPF</b>                                     | 0/14 (0%)<br><b>&lt; 1 eos/HPF</b>                                      | No differences                             |                                            |

|                                      |                                                                                                                                                                                                               |                     |                       |                                                                                              |                                                              |                                                                                       |                                                                 |
|--------------------------------------|---------------------------------------------------------------------------------------------------------------------------------------------------------------------------------------------------------------|---------------------|-----------------------|----------------------------------------------------------------------------------------------|--------------------------------------------------------------|---------------------------------------------------------------------------------------|-----------------------------------------------------------------|
| Gupta, US, 2015 <sup>10</sup>        | Budesonide Viscous solution<br><b>Low-dose</b><br>2-9 yr 0.35 mg<br>10-18 yr 0.5 mg<br><b>Medium-dose</b><br>2-9 yr 1.4 mg<br>10-18 yr 2 mg<br><b>High-dose</b><br>2-9 yr 2.8 mg<br>10-18 yr 4 mg<br>12 weeks | Placebo<br>12 weeks | Children              | Low 12%<br>Medium 42%<br>High 76%*<br><b><math>\leq 1 \text{ eos/HPF}</math></b>             | Placebo 0%<br><br><b><math>\leq 1 \text{ eos/HPF}</math></b> | Symptom resolution on Clinical Symptom Score<br><br>Low 17%<br>Medium 31%<br>High 17% | Symptom resolution on Clinical Symptom Score<br><br>Placebo 33% |
| Miehlke, Germany, 2016 <sup>11</sup> | Budesonide Effervescent tablets (ET)<br>Viscous suspension (VS)<br>2 mg<br>4 mg<br>2 weeks                                                                                                                    | Placebo<br>2 weeks  | Adults<br>19/19/19/19 | ET 2 mg 100%*<br>ET 4 mg 97%*<br>VS 2 mg 94%*<br><b><math>&lt; 15 \text{ eos/HPF}</math></b> | 0%<br><br><b><math>&lt; 15 \text{ eos/HPF}</math></b>        | 4.9 ± 1.4<br>4.2 ± 2.1<br>4.5 ± 1.8<br>Dysphagia Symptom Score                        | 4.7 ± 1.9<br>Dysphagia Symptom Score                            |

\* Grey-marked areas denote statistical significance

**Supplementary Table 6.** Swallowed topical steroid initial dosing for eosinophilic esophagitis treatment<sup>227</sup>.

| <b>Drug</b>                           | <b>Target population</b> | <b>Induction dosing (usually divided doses)</b> | <b>Maintenance dosing (usually divided doses)</b> |
|---------------------------------------|--------------------------|-------------------------------------------------|---------------------------------------------------|
| Fluticasone propionate <sup>a,b</sup> | Children <sup>d</sup>    | 880-1760 mcg/day                                | 440-880 mcg/day                                   |
|                                       | Adults                   | 1760 mcg/day                                    | 880–1760 mcg/day                                  |
| Budesonide <sup>b,c</sup>             | Children <sup>d</sup>    | 1-2 mg/day                                      | 1 mg/day                                          |
|                                       | Adults                   | 2-4 mg/day                                      | 2 mg/day                                          |

<sup>a</sup> If an inhaler is used, the patient should be instructed to puff the medication into their mouth during a breath hold.

<sup>b</sup> Regardless of the form of administration (nebulized or swallowed), patients should fast at least 30–60 min after medication in order to minimize esophageal drug clearance.

<sup>c</sup> Oral viscous budesonide preparation consists of mixing 1–2 mg budesonide with 5 mg of sucralose or similar.

<sup>d</sup> Specific doses in children will be determined by age, height or weight.

**Supplementary Table 7.** Evidence for Statements 29 - 33 (Effectiveness of dietary treatment for induction of histological remission in both pediatric and adult EoE patients).

| Studies                                                                                                                                 | Quality assessment    |               |              |             |                                                         | Summary of findings |                    |             |            | Comments                                                               |
|-----------------------------------------------------------------------------------------------------------------------------------------|-----------------------|---------------|--------------|-------------|---------------------------------------------------------|---------------------|--------------------|-------------|------------|------------------------------------------------------------------------|
|                                                                                                                                         | Risk of bias          | Inconsistency | Indirectness | Imprecision | Other considerations <sup>a</sup>                       | Quality of evidence | Effectiveness rate | 95% CI      | Comparator |                                                                        |
| Elemental diet for achieving histologic remission in EoE (importance of outcome: critical for decision making)                          |                       |               |              |             |                                                         |                     |                    |             |            |                                                                        |
| Efficacy: Proportion of patients with <15 eos/hpf after therapy.                                                                        |                       |               |              |             |                                                         |                     |                    |             |            |                                                                        |
| 1 SR (13 observational studies)                                                                                                         | moderate <sup>b</sup> | moderate      | none         | None        | None                                                    | ⊕⊕⊕⊕<br>Moderate    | 90.8 %             | 84.7 - 95.5 | NA         | 12 studies included pediatric patients; only 1 included adults         |
| Allergy test-directed elimination diets for achieving histologic remission in EoE (importance of outcome: critical for decision making) |                       |               |              |             |                                                         |                     |                    |             |            |                                                                        |
| Efficacy: Proportion of patients with <15 eos/hpf after therapy.                                                                        |                       |               |              |             |                                                         |                     |                    |             |            |                                                                        |
| 1 SR (14 observational studies)                                                                                                         | moderate <sup>b</sup> | high          | none         | moderate    | Several testing approaches were considered <sup>c</sup> | ⊕⊕⊕⊕<br>Moderate    | 45.5 %             | 35.4 - 55.7 | NA         | 12 studies included pediatric patients; 2 included adults <sup>d</sup> |
| Six-food empiric elimination diets for achieving histologic remission in EoE (importance of outcome: critical for decision making)      |                       |               |              |             |                                                         |                     |                    |             |            |                                                                        |
| Efficacy: Proportion of patients with <15 eos/hpf after therapy.                                                                        |                       |               |              |             |                                                         |                     |                    |             |            |                                                                        |
| 1 SR (7 observational studies)                                                                                                          | moderate <sup>b</sup> | low           | none         | moderate    | Some variation in foods excluded                        | ⊕⊕⊕⊕<br>Moderate    | 72.1 %             | 65.8 - 78.1 | NA         | 4 studies included pediatric patients; 3 included adults               |

<sup>a</sup>Including publication bias.

<sup>b</sup>Mainly due to lack of blinding.

<sup>c</sup>The studies have tested regimens based on skin prick testing (SPT) alone, SPT plus atopy patch testing (APT), SPT plus serum IgE, and SPT plus APT plus prick-prick testing.

<sup>d</sup>Significant differences between children (47.9 %) and adults (32.2 %) were noted.

<sup>e</sup>Foods excluded in a six-food elimination diet varied regarding to cereals (from excluding only wheat, gluten-containing cereals and also rice and corn) and legumes (only soy bean or every kind of legumes).

**Supplementary Table 8.** Summary of the results of prospective studies on empiric six- (SFED), four- (FFED), or two- (TFED) food group elimination diets FFED, showing the number and the most common food triggers identified through individual food reintroduction

| First author,<br>year of<br>publication,<br>country | Diet<br>Population            | Histologi<br>c<br>remission | Number of culprit foods<br>identified through individual<br>reintroduction of either six, four<br>or two food groups |     |     | Most common food<br>triggers identified<br>through individual<br>food reintroduction |
|-----------------------------------------------------|-------------------------------|-----------------------------|----------------------------------------------------------------------------------------------------------------------|-----|-----|--------------------------------------------------------------------------------------|
|                                                     |                               |                             | 1                                                                                                                    | 2   | >2  |                                                                                      |
| Kagalwalla,<br>2011, USA <sup>5</sup>               | SFED<br>Children              | 74%                         | 72%                                                                                                                  | 8%  | 8%  | Milk 74%<br>Wheat 26%<br>Eggs 17%                                                    |
| Gonsalves,<br>2012, USA <sup>2</sup>                | SFED<br>Adults                | 70%                         | 85%                                                                                                                  | 15% |     | Wheat 60%<br>Milk 50%                                                                |
| Lucendo,<br>2013, Spain <sup>3</sup>                | SFED<br>Adults                | 72%                         | 36%                                                                                                                  | 31% | 33% | Milk 62%<br>Wheat 29%<br>Egg 26%<br>Legumes 24%                                      |
| Molina-Infante,<br>2014, Spain <sup>6</sup>         | FFED<br>Adults<br>Multicenter | 54%                         | 45%                                                                                                                  | 45% | -   | Milk 50%<br>Egg 36%<br>Wheat 31%<br>Legumes 18%                                      |

|                                           |                                 |     |     |     |     |                                             |
|-------------------------------------------|---------------------------------|-----|-----|-----|-----|---------------------------------------------|
| Kagalwalla,<br>2015, US <sup>7</sup>      | FFED<br>Children<br>Multicenter | 71% | 74% | 21% | 5%  | Milk 68%<br>Egg 26%<br>Wheat 21%            |
| Philpott,<br>2016, Australia <sup>1</sup> | SFED<br>Adults                  | -   | 56% | 17% | 13% | Milk 43%<br>Wheat 43%<br>Eggs 34%           |
| Molina-Infante,<br>2016, Spain            | TFED<br>Adults<br>Multicenter   | 40% | 85% | 15% | -   | Milk 60%<br>Wheat 25%<br>Milk and wheat 15% |

**Supplementary Table 9:** Unmet aspects on EoE arisen during guidelines development to be address in the future.

|                                                                                                                                                                                                                                                                                                                                                                                                                                                                                                                                                                                                                                                                                                                                                                                                                                                                                                                                                                                                                                                                                                                       |
|-----------------------------------------------------------------------------------------------------------------------------------------------------------------------------------------------------------------------------------------------------------------------------------------------------------------------------------------------------------------------------------------------------------------------------------------------------------------------------------------------------------------------------------------------------------------------------------------------------------------------------------------------------------------------------------------------------------------------------------------------------------------------------------------------------------------------------------------------------------------------------------------------------------------------------------------------------------------------------------------------------------------------------------------------------------------------------------------------------------------------|
| <p><b>GENERAL</b></p> <ul style="list-style-type: none"> <li>- Increased disease awareness</li> <li>- Multidisciplinary management of EoE, involving gastroenterologists, pediatricians, allergists, pathologists, dietitians and ENT specialists.</li> <li>- Structured childhood and transition programs</li> </ul>                                                                                                                                                                                                                                                                                                                                                                                                                                                                                                                                                                                                                                                                                                                                                                                                 |
| <p><b>CONCEPT AND EPIDEMIOLOGY</b></p> <ul style="list-style-type: none"> <li>- Etiology and pathophysiology in responders to PPI therapy (GERD, food allergens or both)</li> <li>- Interactions between GERD and EoE</li> <li>- Identification of environmental risk factors influencing EoE for preventive purposes</li> <li>- Why antigens contained in staple foods for centuries are causing now EoE?</li> <li>- Are there distinct causative food triggers in areas different from Europe, North America and Australia?</li> <li>- Updated epidemiologic trends in children and out of Europe and North America</li> </ul>                                                                                                                                                                                                                                                                                                                                                                                                                                                                                      |
| <p><b>DIAGNOSIS AND DISEASE ACTIVITY ASSESSMENT</b></p> <ul style="list-style-type: none"> <li>- Definition of standardized criteria for disease remission and improvement.</li> <li>- Early identification of clinical phenotypes (inflammatory, fibrostenotic, both)</li> <li>- Non- or minimally-invasive diagnostic tools for disease monitoring</li> <li>- Optimization of scores evaluating disease activity through symptoms, endoscopic findings, and quality of life.</li> <li>- The role of the EndoFLIP™ device to identify patients requiring esophageal dilation during follow-up due to impaired esophageal distensibility</li> <li>- Safety of repeat propofol sedation for endoscopy in children</li> <li>- Standardization of eosinophil count method (size of HPF, number of HPF to be examined, mean vs. peak count)</li> <li>- Multicenter external validation of EoEHSS score to standardize histologic assessment of esophageal biopsies.</li> <li>- To improve our diagnostic accuracy in patients with suspected EoE and &lt; 15 eos/HPF or asymptomatic subjects with ≥15 eos/HPF</li> </ul> |
| <p><b>NATURAL HISTORY</b></p> <ul style="list-style-type: none"> <li>- Natural history of patients with suspected EoE and &lt; 15 eos/HPF or asymptomatic with ≥ 15 eos/HPF</li> <li>- Prediction of patients with a progressive phenotype order to guide long-term strategies</li> <li>- Whether maintenance medical (including PPIs) and dietary therapy can reverse the progressive course of EoE</li> </ul>                                                                                                                                                                                                                                                                                                                                                                                                                                                                                                                                                                                                                                                                                                       |
| <p><b>TREATMENT</b></p> <ul style="list-style-type: none"> <li>- Ideal treatment endpoints (symptoms, esophageal inflammation and/or remodeling, EoE gene expression)</li> <li>- Adequate duration of all short-term therapeutic intervention (2, 4, 8, 12 weeks). Are we missing slow responders?</li> <li>- The significance of partial response with any therapeutic intervention (e.g., a 50% reduction in eosinophil count)</li> <li>- The role of combination therapy (PPI plus either corticosteroids or diet). Are we missing partial responders?</li> <li>- Which patients will and will not require maintenance therapy</li> <li>- Frequency of endoscopy in follow-up</li> <li>- Treatment of patients refractory to PPIs, topical steroids and elimination diet</li> </ul>                                                                                                                                                                                                                                                                                                                                |

**PPI therapy**

- Drug and doses required for initial therapy
- Influence of CYP2C19 genotype in initial response to PPI therapy
- The role of other acid suppressive drugs (e.g., vonoprazan)
- Safety issues with maintenance therapy
- More studies in children are required

**Swallowed topical corticosteroids**

- Drug, doses, duration, and delivery system for initial and maintenance therapy
- Safety issues with maintenance therapy, especially in children

**Elimination diet**

- Novel food allergy testing is required to detect triggering foods in EoE
- Whether step-up dietary therapy, first eliminating the one or two more common food triggers in EoE, can optimize our clinical practice and engage patients with diets.
- Long-term efficacy of dietary therapy in adherent patients
- Cross reactivity of food allergens (e.g, cow's milk with other animal milks, wheat with other cereals)
- Nutritional adequacy, and psychological and economic impact of maintenance dietary therapy, especially in children
- Effect of long term food avoidance on QoL of patients with EoE.
